# Supplementary material
Source: publisher figshare collection journal article supplement (https://gsajournals.figshare.com/ndownloader/files/23092349)
Supplement: Supplementary file 1 [file 23092349]

1 tgtgaaattgttatccgctggtatcagctcactcaaaggcggtaatacggttatccacagaatcaggggataacgcaggaaagaacatgtgagcaaaagg

101 ccagcaaaagaccaggaaccgtaaaaaggccgcgttgctggcgtttttccataggctccgcccccctgacgagcatcacaaaaatcgacgctcaagtcag

201 aggtggcgaaacccgacaggactataaagataccaggcgtttccccctggaagctccctcgtgcgctctcctgttccgaccctgccgcttaccggatacc

301 tgtccgcctttctcccttcgggaagcgtggcgctttctcatagctcacgctgtaggtatctcagttcggtgtaggtcgttcgctccaagctgggctgtgt

401 gcacgaaccccccgttcagcccgaccgctgcgccttatccggtaactatcgtcttgagtccaacccggtaagacacgacttatcgccactggcagcagcc

501 actggtaacaggattagcagagcgaggtatgtaggcggtgctacagagttcttgaagtggtggcctaactacggctacactagaaggacagtatttggta

601 tctgcgctctgctgaagccagttaccttcggaaaaagagttggtagctcttgatccggcaaacaaaccaccgctggtagcggtggtttttttgtttgcaa

701 gcagcagattacgcgcagaaaaaaaggatctcaagaagatcctttgatcttttctacggggtctgacgctcagtggaacgaaaactcacgttaagggatt

801 ttggtcatgagattatcaaaaaggatcttcacctagatccttttaaattaaaaatgaagttttaaatcaatctaaagtatatatgagtaaacttggtctg

901 acagttaccaatgcttaatcagtgaggcacctatctcagcgatctgtctatttcgttcatccatagttgcctgactccccgtcgtgtagataactacgat

1001 acgggagggcttaccatctggccccagtgctgcaatgataccgcgagacccacgctcaccggctccagatttatcagcaataaaccagccagccggaagg

1101 gccgagcgcagaagtggtcctgcaactttatccgcctccatccagtctattaattgttgccgggaagctagagtaagtagttcgccagttaatagtttgc

1201 gcaacgttgttgccattgctacaggcatcgtggtgtcacgctcgtcgtttggtatggcttcattcagctccggttcccaacgatcaaggcgagttacatg

1301 atcccccatgttgtgcaaaaaagcggttagctccttcgg­­tcctccgatcgttgtcagaagtaagttggccgcagtgttatcactcatggttatggcagca

1401 ctgcataattctcttactgtcatgccatccgtaagatgcttttctgtgactggtgagtactcaaccaagtcattctgagaatagtgtatgcggcgaccga

1501 gttgctcttgcccggcgtcaatacgggataataccgcgccacatagcagaactttaaaagtgctcatcattggaaaacgttcttcggggcgaaaactctc

1601 aaggatcttaccgctgttgagatccagttcgatgtaacccactcgtgcacccaactgatcttcagcatcttttactttcaccagcgtttctgggtgagca

1701 aaaacaggaaggcaaaatgccgcaaaaaagggaataagggcgacacggaaatgttgaatactcatactcttcctttttcaatattattgaagcatttatc

1801 agggttattgtctcatgagcggatacatatttgaatgtatttagaaaaataaacaaataggggttccgcgcacatttccccgaaaagtgccacctgacgt

1901 ctaagaaaccattattatcatgacattaacctataaaaataggcgtatcacgaggccctttcgtctcgcgcgtttcggtgatgacggtgaaaacctctga

2001 cacatgcagctcccggagacggtcacagcttgtctgtaagcggatgccgggagcagacaagcccgtcagggcgcgtcagcgggtgttggcgggtgtcggg

2101 gctggcttaactatgcggcatcagagcagattgtactgagagtgcaccatatgcggtgtgaaataccgcacagatgcgtaaggagaaaataccgcatcag

2201 gcgccattcgccattcaggctgcgcaactgttgggaagggcgatcggtgcgggcctcttcgctattacgccagctggcgaaagggggatgtgctgcaagg

2301 cgattaagttgggtaacgccagCACGTGtgtttttgaacacggcgatatgtatctgtagatcatccccaattttcaacaatgaatctaaatactgaactt

2401 tttgtgtaatctttagtgcagaaaaatgaccaaaatcagcgattttccgattatacccaaaatatctcagctcaatgagcacctataaaaatgtaaaaat

2501 aaagaaagtagtcgaaccatattttgtaaaggctaaaaaactgaataaatttttatccatccagcgcggcgttacaatccgtggcccatgtcacgcacgg

2601 ctttcaaagaaaaaaaaacagtctgtttgcgcgacatcgatctggcaaaaatcctaaaaacgactatgcgtggctcactttatattaatatgaaaaatac

2701 aaacttggtggtgcaggtgctgcagaggccatcgatgaagaagtggaggccttgttgtcgatctacaaaattgtatggttgtttgagattttccttgaaa

2801 cgctctcaatcttggatatgatataaattctggataagatatgatggatatgatctatgtttgatagagtgcatttgaaaggataacggccctgcagaca

2901 tttttgaaaaaataacaaacatttaattttctcactcgtttaggctattcccctatttttgatattccttcgcacatatgaaaactactttttttcgaaa

3001 ctgttaactccagaatttataaatctatagcccttacttgattatttattatcatggttactcacctcatgtctctttctcttttcaagaagtcttcgtt

3101 catatctgttgtctctttcctccttttgaatctctgctttgctcttcgccattgtttcctgaaaataatgtaacttgaattgtgtaatatacttttttaa

3201 tttgaatttggcttgtaacgcggaatcactacgtgcgggatcatttcttactagaaaacccagaaaatgccatatttcacttatctcggggtcatttcta

3301 attagaaaagctacaaaaaccatttctaattacggtgactttagaactggtcgaaatagctaattagaaatgggtttttgctaattagaggtgactctat

3401 gttatctgagtaagcctcgtttgtatgtaaactcacagtactaataaatgcaagacacccgggtttgtctagatatgaaataattgaaatatcaattctg

3501 acagacaataatggtaatcttgataaggagttccacgcccaggagaacacgttagttttcttgtttttgattgcgtgcgttattttggagaaaaactcga

3601 ttttttacaaaataattttttgaaaggaacactgttcaataagttttgtcttttttctcagttgtgatacggttttttattcttttttgtagttatacag

3701 aagaccgcctgcaggGGACAGTCCTGCCGAGGTGGAGGgaccgttacgtctaccgtcacttcgcctccgccgccctcccaatcccagaggtcctcgacat

3801 cggagagttctccgagtccctcacctactgcatctcccgtcgtgcccaaggagtcaccctccaagacctcccagagaccgagctcccagccgtcctccaa

3901 ccagtcgccgaggccatggacgccatcgccgccgccgacctctcccaaacctccggattcggaccattcggaccacaaggaatcggacaatacaccacct

4001 ggcgtgacttcatctgcgccatcgccgacccacacgtctaccactggcaaaccgtcatggacgacaccgtctccgcctccgtcgcccaagccctcgacga

4101 gctcatgctctgggccgaggactgcccagaggtccgtcacctcgtccacgccgacttcggatccaacaacgtcctcaccgacaacggacgtatcaccgcc

4201 gtcatcgactggtccgaggccatgttcggagactcccaatacgaggtcgccaacatcttcttctggcgtccatggctcgcctgcatggagcaacaaaccc

4301 gttacttcgagcgtcgtcacccagagctcgccggatccccacgtctccgtgcctacatgctccgtatcggactcgaccaactctaccaatccctcgtcga

4401 cggaaacttcgacgacgccgcctgggcccaaggacgttgcgacgccatcgtccgttccggagccggaaccgtcggacgtacccaaatcgcccgtcgttcc

4501 gccgccgtctggaccgacggatgcgtcgaggtcctcgccgactccggaaaccgtcgtccatccacccgtccacgtgccaaggagtaaGTCCAATTACTCT

4601 TCAACATCCCTACATGCTCTTTCTCCCTGTGCTCCCACCCCCTATTTTTGTTATTATCAAAAAACTTCTCTTAATTTCTTTGTTTTTTAGCTTCTTTTAA

4701 GTCACCTCTAACAATGAAATTGTGTAGATTCAAAAATAGAATTAATTCGTAATAAAAAGTCGAAAAAAATTGTGCTCCCTCCCCCCATTAATAATAATTC

4801 TATCCCAAAATCTACACAATGTTCTGTGTACACTTCTTATGTTTTTTACTTCTGATAAATTTTTTTGAAACATCATAGAAAAAACCGCACACAAAATACC

4901 TTATCATATGTTACGTTTCAGTTTATGACCGCAATTTTTActagtgcaggagctgtaagtttaaaATAACTTCGTATAGCATACATTATACGAAGTTATt

5001 ttcagGGAGAGCAAAAGCTTATCTCCGAGGAGGACCTCTAAGGATGATCGACGCCaACGTCGTTGAATTTTCAAATTTTAAATACTGAATATTTGTTTTT

5101 TTTCCTATTATTTATTTATTCTCTTTGTGTTTTTTTTCTTGCTTTCTAAAAAATTAATTCAATCCAAATCTAAacatttttttttctctttccgtctccc

5201 aattcgtattccgctcctctcatctgaacacaatgtgcaagtttatttatcttctcgctttcatttcattaggacgtggggggaattggtggaaggggga

5301 aacacacaaaaggatgatggaaatgaaataaggacacacaatatgcaacaacattcaattcagaaatatggaggaaggtttaaaagaaaacataaaaata

5401 tatagaggaggaaggaaactagctgccctcgattgtctatcttccattctcaccaagtttcaacaactttattcagtcattcttctctggttcatttccc

5501 aaccaatcttcccgaataaagcccatctgtcctttcggccacattcctcacctacatccgtactccttatctcccgttcttatccagtcttttatcgtct

5601 ctgcgtctcgcacactgtctcgtcggtaatgtaaaaaaaaaacaaaaaaaacttgaaaacttgcggaaagatttcctaataaaaggagacgaatccggta

5701 ggaaatcgacaagtctctgcttctcgaagactaggtgagttacatttctttggccgaattattttgaaatcctaaatttgataatttcagagATGTCTGT

5801 AAAACTTGCGTGTTATGTGACGGCTTCGGTCACTGTCGCCACTCTTATGGTATGCTTCATGACCATGTCAACCATCTACTCGGAGGTTGATGGATTCAGA

5901 GAGAAGCTTGATACCGAGATGAATGTGTTCAGAgtgagttaaattatattttgaattttaaataatttttaattttctagCAATCTACCAATGGATTGTG

6001 GAAGGACATAGTTGTCATCGGAAGATCTAGCAAGCGTGTCCGTTGTCAATATGAAGAGACCAACGCTACCCCAACTCCACATGCTGATGGATCCCCATCT

6101 GCTCCACCAGGTCAACCACCAGCAGTTCCACCAGTCTTCAACCAGCCAAAGACTCCAAATGGAGCCAATGGAAATGGACCAACCTGCAACTGCAATGCTG

6201 ATAACAAGTGCCCAGCTGGACCATCCGGACCAAAGGGAGTTCCAGGAGTTCCAGGACTCGACGGAGTTCCAGGACTTGACGGTGTTCCAGGAGTTGGAGC

6301 TGATGATATCGCTCCACAACGCGAGTCTGTCGGATGCTTCACTTGCCCACAAGGACCAGTTGGACCACCAGGAGCTCTTGGAAGACCAGGACCACGTGGA

6401 CTTCCAGGACCAAGAGGACAAAATGGAAACCCAGGAAGAGATGGACAACCAGGACATCCAGGAGAGCAAGGATCATCCGGTCAAATCGGAAAGATCGGAG

6501 AGCCAGGACCACCAGGAGAGAAGGGACGCGACGCCGAGCATCCAATCGGAAGACCAGGACCAAAGGGACCAAGAGGAGATCAAGGACCAACAGGACCAGC

6601 TGGACAGAACGGTCTTCACGGACCACCAGGAGAGCCAGGAACCGTTGGACCAGAAGGACCATCTGGAAAGCAAGGACGTCAAGGACCAGACGGAACCCAG

6701 GGAGAGACTGGACCAGACGGAAGACCAGGAAAGGATGCCGAGTACTGCCAGTGCCCAGACAAGTCTCCACCATCAGAGGCTGTCAACGCCAACCGTGGAT

6801 ACAGAAATATCTAAattgttggtgttttctaataaaatatttgagattcagtgagacttttttcttggcggcacaataaagtttcctctttttgttgggt

6901 cactcaacgaacacaatacaaatatttgagcgctcgcatttttctcaacctttcgggtttaaagcacttcaaaatggaattgaagagagattgtgaaagt

7001 acatcagacagaatcacattttgatagcattcacttcactcagatgcaaacttttcagtgactataaaaagtcataaaataataacattaaaaaagcaaa

7101 taaattagcgagagaattttttgacaaaaagaaagaagagtgatagagaagaagggaatgcttgaaaggattttgcatttatcttaATCACCGTCTTCGA

7201 GAAGACGAACCATGGCGCCAGTTTCAGAATCCAAGTTTCTAATATAGTTCATCACAATGTTGACGTTGGTCCAACCTCCGGCTTGCATAATCTCTGGGAT

7301 GGAAACTCCAGCGCGAGCCATGTCACGGGCAGCTCCGACACGGGCGGAATGTCCAGACCAAGCCAAGTAACGTTGTCCGGAATCATCCTTGGCTCCGTAG

7401 ATGAGACGGTGGGTAGCTTCGAAGATTCctgaaaatttattttcagcttattcttagctaatatgttgtttaaacttacCTTCAAGAGCTCGAGTCGAGA

7501 GTTGTGATGTTGCACTCGGGGCAGCAACTCCGTTCTTGCGAACACGACAGAACAGGTAGTTGTTTGGATCATCGGCGACTCCGGAAACCGAAATCCAGCG

7601 CTCAACGAGCTTGGTAACTCCAAGGGAGAGCGCTTTTTCGACTCCGGCAGTCGAGACCAGCGTTTTTGTACGTCCGATGTGGATGAGCATTCTTCCTCCG

7701 TCTGTGCGACTAATATCCTTGACGCGAATGCGGGCAATTTCGGCGATACGGAGAAGTGTGTTGTAAGCAATTCCGAGGAAGGCGAGGTTTCGGATGTCCT

7801 GGCAACGATCGGAATTTTCCATAAGAGAACGGACCTGATCGAAGTCGGTTctgaaaatttcgtcaagtcttaggattgaatacattaatatttaaactta

7901 cCTTTCGAAGGCGAGGGCTTGCTTGGCTCTCTCTCCAGCATCAACATTTTCCTTGCGGATACGTCTCATTACGAGAGATACGGCATTAGAATCTGATGGG

8001 CGTGGAAGTCCAGATCGGCGATGGAGCATATTGAGCTGTCCGAGATGTTGTTGGATCGTCTTCACCGCCAATCCACGAGCTTGGAGGTAGAGCAAGTAGT

8101 CACGAACGTCTTCTGGCTCGGCTGGGAACCACTTGCGGTTGTTAAGCTTGCACCAGGCAGCCCAAGAACGGCACACTGAGAGAAGCATCTTCCAGGTGTG

8201 CTCGGAGAAGGCTTGTCTGTCACGGAACATATCCATGAGGTTCTTGCGAACTTCATCACTTGTCGCGTCAACTGGAAGTGCTGGAAGATTTTGATGAACA

8301 GTGAGAAGATTTGACATattttcgaagttttttagatgcactagaacaaagcgtgttggcttcctctgagcccgctttccttatatacccgcattctgca

8401 gccttacagaatgttctagaaggtcctagatgcattcgtttgaaaatactcccggtgggtgcaaagagacgcagacggaaaatgtatctgggtctcttta

8501 ttgtgtacactacttttccatgtaccgaatgtgagtcgccctccttttgcaacaagcagctcgaatgttctagaaaaaggtggaaaatagtataaatacc

8601 gttgaaaataaataccgaacaacatttgctctaattgtgaaattagaaatcttcaaactataatcatgtcactttaccactatttccgtccagctcaacg

8701 ttccgtttttggtgatcATTTTTGCTTTCGTCGTAAATCTACACACGCGTCTCTTCCGTGCGAGAGTCCAAGCCAGCAGCCAAATTCGTTGACTGAGTAT

8801 TCAACGTTTATACGTTGTCGGCAACGAGAAATAGGAAAATGCATCGGGAAATGTTCTTTTTTCGATTTTTTCCAAGGTTTTGACAAATTTTACCACGAAT

8901 TTTGCTATGTTTTCAATTAAAAAATATGTTATTCAACTGTTTCTATGAGGAAAATAAGGCTTTGCATGTAATTTTCTTATTCAGCATAATTTTTAATTAA

9001 TTTGAATTTTCTGTCCTAACGTTTATTTTGTTTTCTTGGTTATGACTGATCTGAAATTAATTTTTGAATTTTAAGGTAATATGTCAGGCGGTGCCGCAAG

9101 TTTGTACAAAAAAGCAGGCTCCATGAAAAAGCCTGAACTCACCGCGACGTCTGTCGAGAAGTTTCTGATCGAAAAGTTCGACAGCGTCTCCGACCTGATG

9201 CAGCTCTCGGAGGGCGAAGAATCTCGTGCTTTCAGCTTCGATGTAGGAGGGCGTGGATATGTCCTGCGGGTAAATAGCTGCGCCGATGGTTTCTACAAAG

9301 ATCGTTATGTTTATCGGCACTTTGCATCGGCCGCGCTCCCGATTCCGGAAGTGCTTGACATTGGGGAATTCAGCGAGAGCCTGACCTATTGCATCTCCCG

9401 CCGTGCACAGGGTGTCACGTTGCAAGACCTGCCTGAAACCGAACTGCCCGCTGTTCTGCAGCCGGTCGCGGAGGCCATGGATGCGATCGCTGCGGCCGAT

9501 CTTAGCCAGACGAGCGGGTTCGGCCCATTCGGACCGCAAGGAATCGGTCAATACACTACATGGCGTGATTTCATATGCGCGATTGCTGATCCCCATGTGT

9601 ATCACTGGCAAACTGTGATGGACGACACCGTCAGTGCGTCCGTCGCGCAGGCTCTCGATGAGCTGATGCTTTGGGCCGAGGACTGCCCCGAAGTCCGGCA

9701 CCTCGTGCACGCGGATTTCGGCTCCAACAATGTCCTGACGGACAATGGCCGCATAACAGCGGTCATTGACTGGAGCGAGGCGATGTTCGGGGATTCCCAA

9801 TACGAGGTCGCCAACATCTTCTTCTGGAGGCCGTGGTTGGCTTGTATGGAGCAGCAGACGCGCTACTTCGAGCGGAGGCATCCGGAGCTTGCAGGATCGC

9901 CGCGGCTCCGGGCGTATATGCTCCGCATTGGTCTTGACCAACTCTATCAGAGCTTGGTTGACGGCAATTTCGATGATGCAGCTTGGGCGCAGGGTCGATG

10001 CGACGCAATCGTCCGATCCGGAGCCGGGACTGTCGGGCGTACACAAATCGCCCGCAGAAGCGCGGCCGTCTGGACCGATGGCTGTGTAGAAGTACTCGCC

10101 GATAGTGGAAACCGACGCCCCAGCACTCGTCCGAGGGCAAAGGAATAGACCCAGCTTTCTTGTACAAAGTGGGTCCAATTACTCTTCAACATCCCTACAT

10201 GCTCTTTCTCCCTGTGCTCCCACCCCCTATTTTTGTTATTATCAAAAAACTTCTCTTAATTTCTTTGTTTTTTAGCTTCTTTTAAGTCACCTCTAACAAT

10301 GAAATTGTGTAGATTCAAAAATAGAATTAATTCGTAATAAAAAGTCGAAAAAAATTGTGCTCCCTCCCCCCATTAATAATAATTCTATCCCAAAATCTAC

10401 ACAATGTTCTGTGTACACTTCTTATGTTTTTTACTTCTGATAAATTTTTTTGAAACATCATAGAAAAAACCGCACACAAAATACCTTATCATATGTTACG

10501 TTTCAGTTTATGACCGCAATTTTTAATAACTTCGTATAGCATACATTATACGAAGTTATtttcagGGAGCCGGATCTGagctcttaagacgaagtgagtt

10601 tgctaccatcatggaatcaggaggacatttcgacaatgtcatataatgtttgaaaaatgattttaacaagggtctcattcgagataagcaatgctctgag

10701 caagtggctcgtcgtcttcaagaatctcttgttgatattcatttggatcctgttttgcacgaagcatgtgccatggatattcagagtttttgcaaaaaag

10801 ttccgccaggtcaaacaatctttttaatttttatatgatacttcgggtgtatttttcttctttttcctgttcattttcgcttttttctcacttttttgta

10901 acaaaatctctcacttttctgtaagtcttaacaaaagttcaattggctcgatcaagtaaaatttcggccgtatgaacgttttcaaaggttttcatttttt

11001 tttaagttcattcacaatatcatgaatctctcgtcctttggtttccggtaagtagcgaaataatataagcatacttataaatgaaggaattgaatataga

11101 ataaggaaagcataactaccaataacggaatatagaggtaatactgtaaatgtactgataaccaccattacagtattcattgaatatgccacagattgag

11201 caatactacgatgtttttgaggtaccagttcagaggatataaaccacgaaattggaccaactccagttctgaaatttcattattcgattaaatcaaaata

11301 tatttgaaaaacctcacccataagtataaccgtagatgatcaatgcaactaggcatccgtatttcatcgggtcaatcagaatacgtatttttgcgaagaa

11401 tacgaatgcaattagagctaaattattgagaaatgtgaagagaaggagaagcttgcgtcgaccaactctgtaaacttattcatacaattttgtcttcaaa

11501 ttttgaacgtttaaaactatcttattcaatgagttagcgggtttttatagtgagttagttcacgattatctaataaaactatgtccaaacatcctaactg

11601 cgaccgtattctcactaactcgtcttaaaaacgttgagattattttaaacccttcttcagtacaactacagtactgatgcacaaatacaataataataat

11701 acattcagacatactctgaacaatgtaacttgtttttgttatactgtggtaacatttattgaaatgaaatataaccttacttttcaatcacaattccacc

11801 agtaattgttccagaaacataagctaaacccattgcagttgtactccattcagcaatttctgactcaacatttgcattttctagaaagaaagtagaggat

11901 aaaagaagagcccataatccgacaGGGCCC

**Figure S1**. (A) Schematic of landing pad insertion vector pMS74 and (B) corresponding color-coded sequence
